# Supplementary material for: Sn-MFI as active, sulphur and water tolerant catalysts for selective reduction of NOx
Source: Royal Society of Chemistry journal article supplement (doi:10.1039/c5ra05306d), 2015-01-01
Supplement: c5ra05306d1.pdf [file c5ra05306d1.pdf]

## Supporting Information

# Sn-MFI as Active, Sulphur and Water Tolerant Catalysts for Selective Reduction of NO<sub>x</sub>

Yue Peng<sup>†</sup>, Honggen Peng<sup>†</sup>, Wenming Liu, Yawen Liu, Conghui Wang, Mengjia Hao, Fangfang Ren, Yarong Li, Xianglan Xu, Xiang Wang<sup>\*[a]</sup>

*College of Chemistry, Nanchang University, Nanchang, Jiangxi 330031, P. R. China*

<sup>\*[a]</sup> Corresponding author: [xwang23@ncu.edu.cn](mailto:xwang23@ncu.edu.cn)

**Table S1.** ICP measurements of the chemical compositions of Sn-MFI samples

| Samples      | Si/Sn molar ratio <sup>[a]</sup> | Si/Sn molar ratio <sup>[b]</sup> | SnO <sub>2</sub> contents (%) <sup>[b]</sup> |
|--------------|----------------------------------|----------------------------------|----------------------------------------------|
| Silicalite-1 | --                               | --                               | --                                           |
| Sn-MFI-133   | 133                              | 131                              | 1.9                                          |
| Sn-MFI-67    | 67                               | 65                               | 3.6                                          |
| Sn-MFI-33    | 33                               | 33                               | 7.1                                          |

[a] Initial Si/Sn ratios for sample preparation.

[b] Identified by ICP-AES.

<sup>\*[a]</sup>Y. Peng, Dr. H.G.Peng, Prof. W.M. Liu, Y.W. Liu, C.H. Wang,

M.J. Hao, F.F. Ren, Y.R. Li, Dr. X.L. Xu, Prof. Dr. X. Wang

Department of Chemistry

Nanchang University

Nanchang, Jiangxi 330031, P. R. China

Tel: +86 15979149877 (X. Wang)

E-mail: [xwang23@ncu.edu.cn](mailto:xwang23@ncu.edu.cn) (X. Wang)

[<sup>†</sup>] These authors contributed equally to this work.

**Table S2.** Textural properties of Sn-MFI samples measured by XRD and SEM.

| Samples      | Mean Crystallite size<br>(nm) <sup>[a]</sup> | Mean particle size<br>( $\mu\text{m}$ ) <sup>[b]</sup> | Agglomeration<br>factor <sup>[c]</sup> |
|--------------|----------------------------------------------|--------------------------------------------------------|----------------------------------------|
| Silicalite-1 | 51.7                                         | 9.5                                                    | 245.5                                  |
| Sn-MFI-133   | 44.3                                         | 1.0                                                    | 29.5                                   |
| Sn-MFI-67    | 41.0                                         | 0.7                                                    | 20.5                                   |
| Sn-MFI-33    | 31.5                                         | 0.5                                                    | 19.5                                   |
| Sn-MFI-20    | --                                           | 0.2                                                    | --                                     |

[a] Measured by XRD and based on hkl (101) peak.

[b] Measured by SEM.

[c] Measured by Mean particle size/Mean crystallite size.[1]

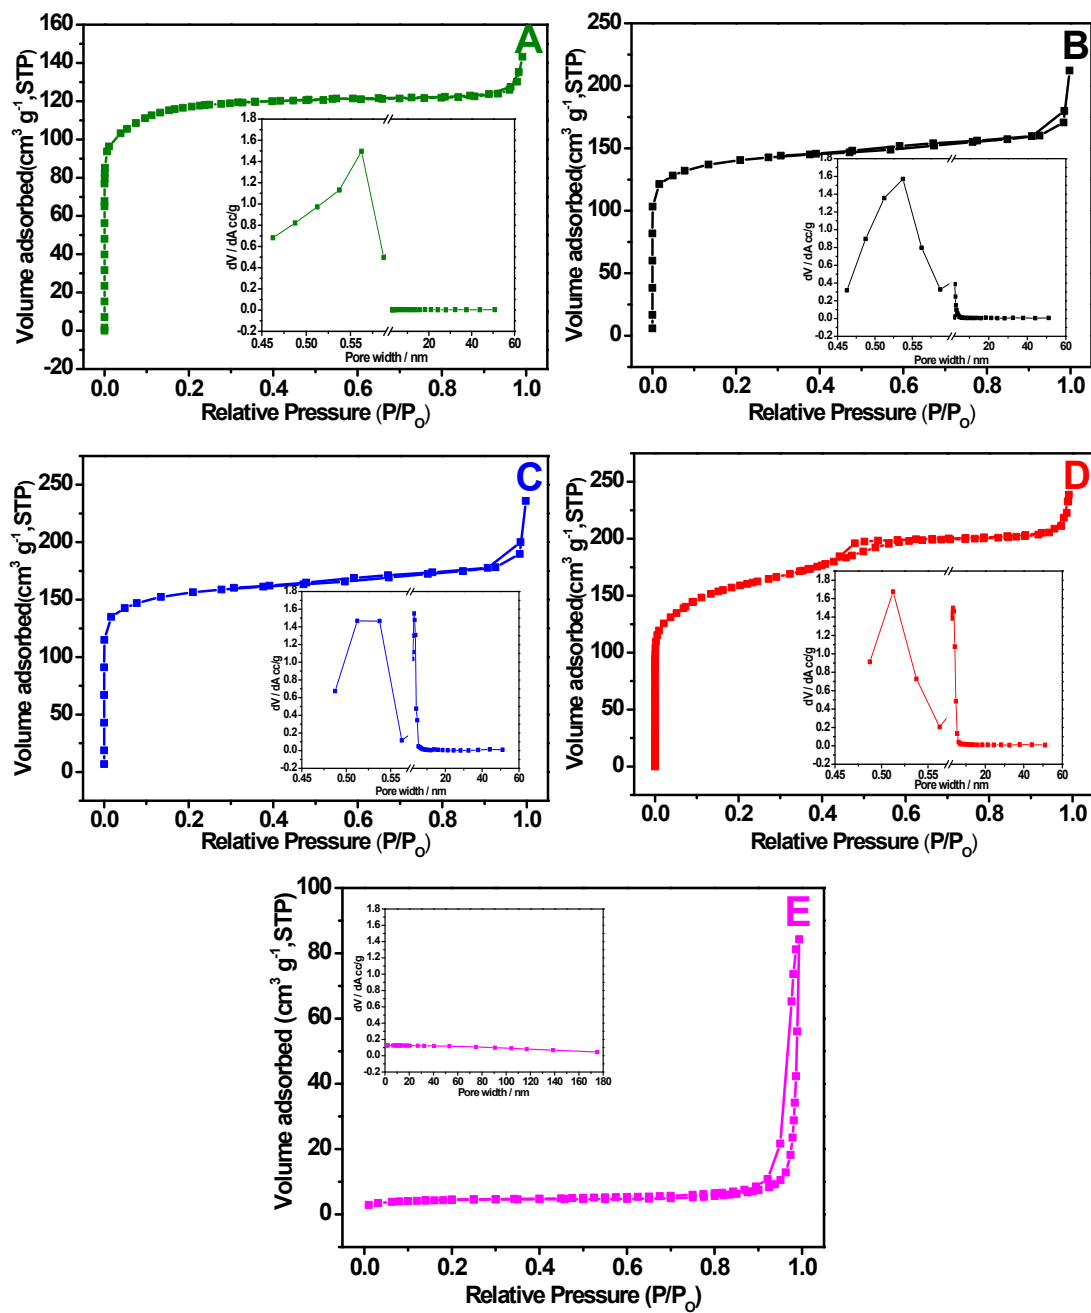

**Fig. S1.**  $N_2$  adsorption-desorption isotherms and pore size distributions of Silicalite-1 (A), Sn-MFI-133 (B), Sn-MFI-67 (C), Sn-MFI-33 (D) and Sn-MFI-20 (E)

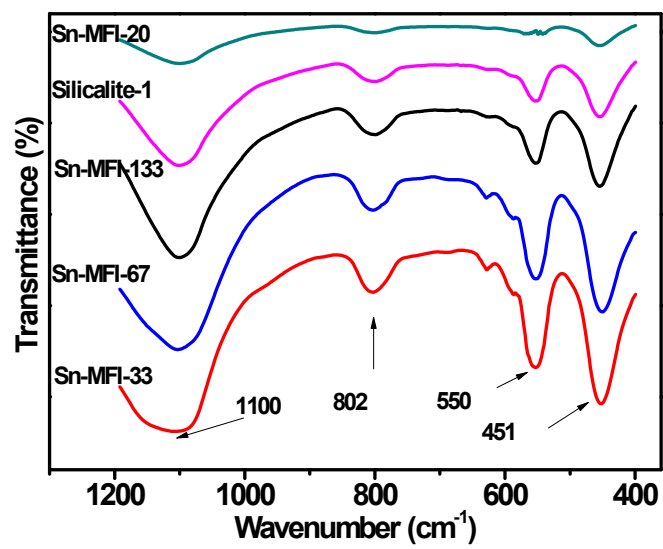

Fig. S2. FTIR spectra of Sn-MFI samples

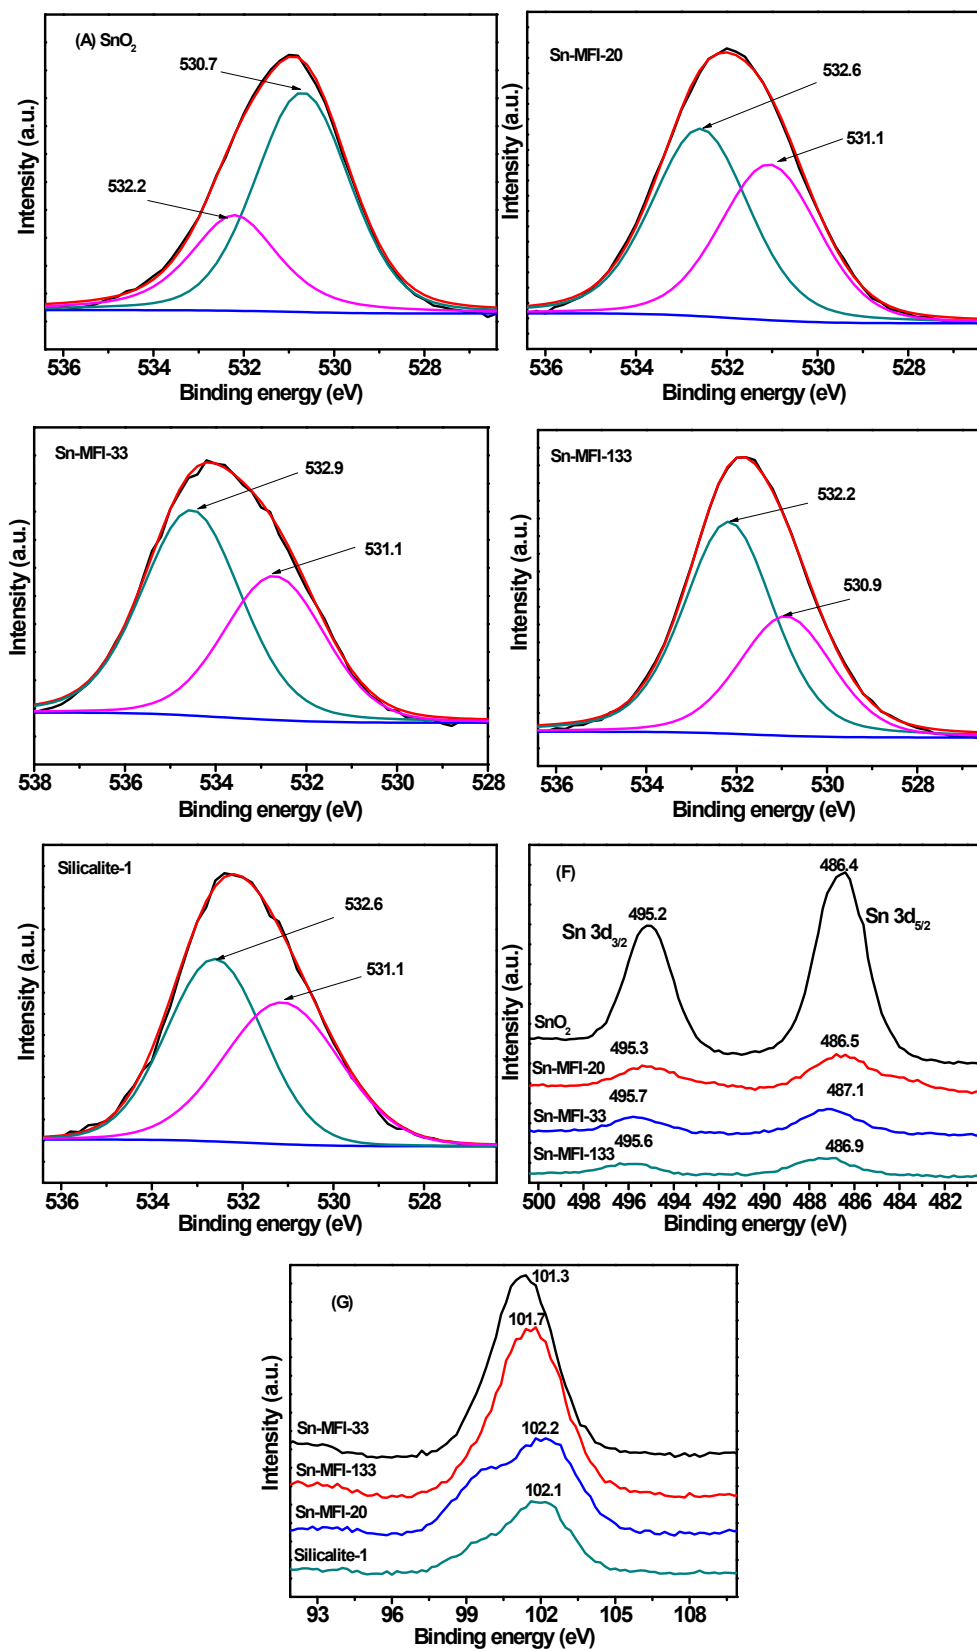

**Fig. S3.** XPS analysis of Sn-MFI samples: A-E) deconvolution of O 1s peaks; F) Sn 3d peaks; G) Si 2p peaks

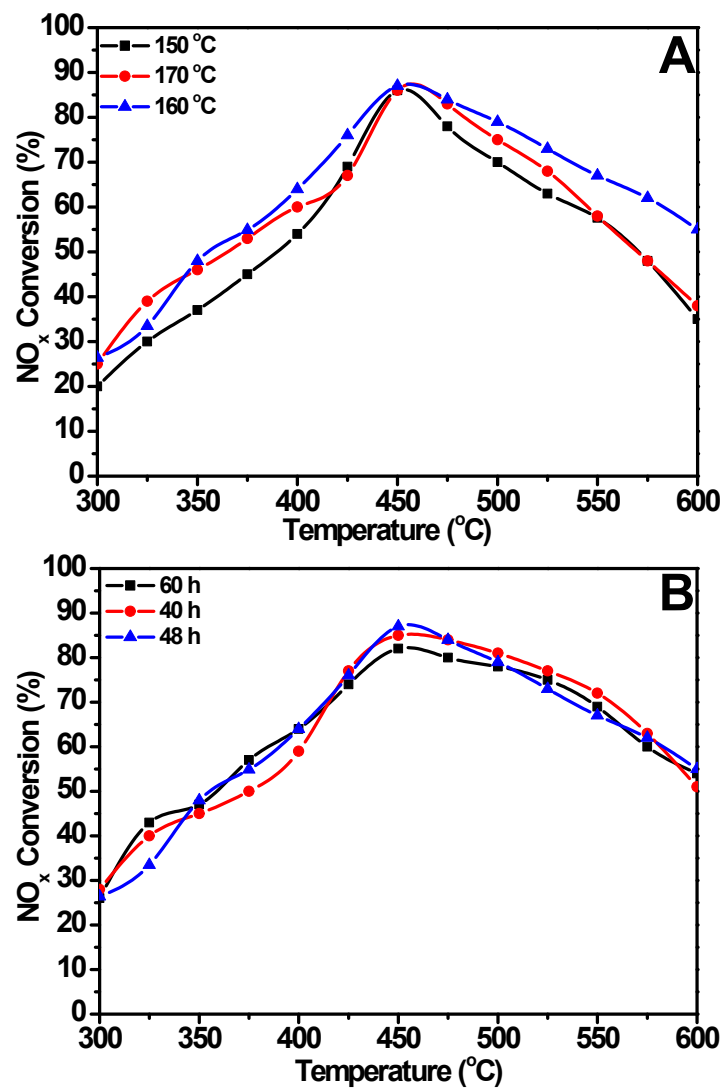

Fig. S4. Effects of (A) crystallization temperature and (B) crystallization time on the reaction performance  n-

MFI-33

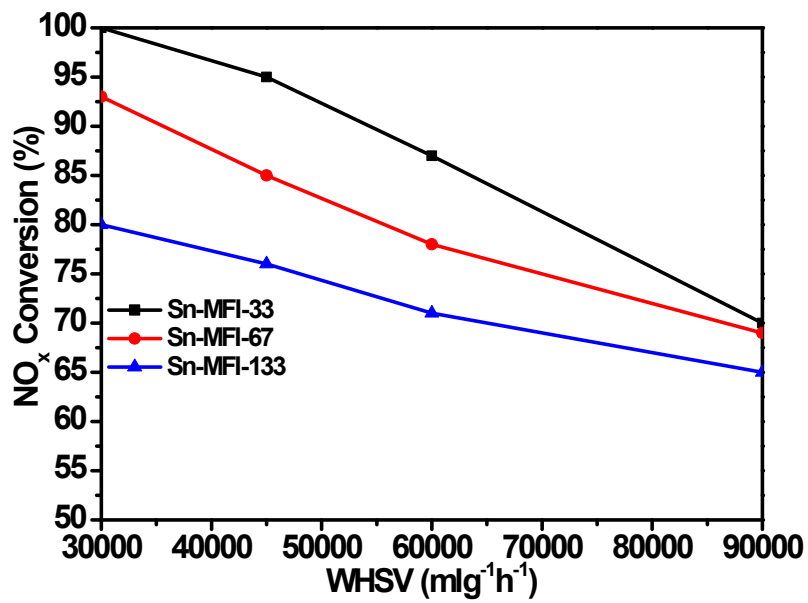

Fig. S5. Effects of WHSV on the reaction performance of Sn-MFI-33

[1] J. Yu, D. Zhao, X. Xu, X. Wang, N. Zhang, *ChemCatChem*, 2012, 4, 1122-1132.
